# Supplementary material for: Performance and ease of use of a molecular point-of-care test for influenza A/B and RSV in patients presenting to primary care
Source: Springer Nature journal article supplement (doi:10.1007/s10096-020-03860-5), 2020-03-14
Supplement: MOESM1 [file 17798988]

# Acceptability and Failure Mode Analysis: Roche Liat (ALIC4E)

\*Required

## 1. First Name and Surname \*

---

## 2. Number of tests performed \*

---

## 3. Acceptability \*

Mark only one oval per row.

|                                                                | completely disagree   | rather disagree       | neutral               | rather agree          | completely agree      |
|----------------------------------------------------------------|-----------------------|-----------------------|-----------------------|-----------------------|-----------------------|
| the device takes up little space                               | <input type="radio"/> | <input type="radio"/> | <input type="radio"/> | <input type="radio"/> | <input type="radio"/> |
| the start-up of the device is easy                             | <input type="radio"/> | <input type="radio"/> | <input type="radio"/> | <input type="radio"/> | <input type="radio"/> |
| the cartridges is easy to handle                               | <input type="radio"/> | <input type="radio"/> | <input type="radio"/> | <input type="radio"/> | <input type="radio"/> |
| the touch screen is easy to operate                            | <input type="radio"/> | <input type="radio"/> | <input type="radio"/> | <input type="radio"/> | <input type="radio"/> |
| the screen is easy to read under different lighting conditions | <input type="radio"/> | <input type="radio"/> | <input type="radio"/> | <input type="radio"/> | <input type="radio"/> |
| the symbols used are clear and unambiguous                     | <input type="radio"/> | <input type="radio"/> | <input type="radio"/> | <input type="radio"/> | <input type="radio"/> |
| the duration of the test analysis is acceptable                | <input type="radio"/> | <input type="radio"/> | <input type="radio"/> | <input type="radio"/> | <input type="radio"/> |
| the error codes are easy to interpret                          | <input type="radio"/> | <input type="radio"/> | <input type="radio"/> | <input type="radio"/> | <input type="radio"/> |
| it is clear how I should respond to the error code             | <input type="radio"/> | <input type="radio"/> | <input type="radio"/> | <input type="radio"/> | <input type="radio"/> |
| the stock is easy to store and has a long shelf life           | <input type="radio"/> | <input type="radio"/> | <input type="radio"/> | <input type="radio"/> | <input type="radio"/> |
| the included manual is sufficient to operate the device        | <input type="radio"/> | <input type="radio"/> | <input type="radio"/> | <input type="radio"/> | <input type="radio"/> |
| I operate the device and handle the cartridge confidently      | <input type="radio"/> | <input type="radio"/> | <input type="radio"/> | <input type="radio"/> | <input type="radio"/> |

**4. Risk of Misinterpretation \***

If one of these errors should occur, how big is the risk of misinterpretation?

Mark only one oval per row.

|                                                      | low risk              | medium risk           | high risk             | difficult to assess   |
|------------------------------------------------------|-----------------------|-----------------------|-----------------------|-----------------------|
| the cartridge has expired or has already been used   | <input type="radio"/> | <input type="radio"/> | <input type="radio"/> | <input type="radio"/> |
| the sample volume is insufficient                    | <input type="radio"/> | <input type="radio"/> | <input type="radio"/> | <input type="radio"/> |
| incorrect insertion of the cartridge into the device | <input type="radio"/> | <input type="radio"/> | <input type="radio"/> | <input type="radio"/> |
| the result is unexpected or illogical                | <input type="radio"/> | <input type="radio"/> | <input type="radio"/> | <input type="radio"/> |
| the error code and the actual error do not match     | <input type="radio"/> | <input type="radio"/> | <input type="radio"/> | <input type="radio"/> |

**5. Detection of failure modes \***

If one of these errors should occur, how likely is it that you would notice this error?

Mark only one oval per row.

|                                                      | always perceivable    | probably perceivable  | not perceivable       |
|------------------------------------------------------|-----------------------|-----------------------|-----------------------|
| the cartridge has expired or has already been used   | <input type="radio"/> | <input type="radio"/> | <input type="radio"/> |
| the sample volume is insufficient                    | <input type="radio"/> | <input type="radio"/> | <input type="radio"/> |
| incorrect insertion of the cartridge into the device | <input type="radio"/> | <input type="radio"/> | <input type="radio"/> |
| the result is unexpected or illogical                | <input type="radio"/> | <input type="radio"/> | <input type="radio"/> |
| the error code and the actual error do not match     | <input type="radio"/> | <input type="radio"/> | <input type="radio"/> |

**6. Which are the strengths of this device according to you?**

---

---

---

---

---

**7. What are the shortcomings of this device?**

---

---

---

---

---

**8. Other remarks?**

---

---

---

---

---
